# Supplementary material for: Spatiotemporal control of kinesin motor protein by photoswitches enabling selective single microtubule regulations
Source: Royal Society of Chemistry journal article supplement (doi:10.1039/c6lc01098a), 2016-01-01
Supplement: c6lc01098a1.pdf [file c6lc01098a1.pdf]

## Electronic Supplementary Information

### Spatiotemporal control of kinesin motor protein by photoswitches enabling selective single microtubule regulations

K. R. Sunil Kumar, Ammathnadu S. Amrutha and Nobuyuki Tamaoki\*

#### HPLC analysis on the conversion ratio from *E* to *Z* and *Z* to *E* forms of Azo-peptide

The photo conversion ratio from *trans* (*E*) to *cis* (*Z*) and *cis* to *trans* of the azo unit in Azo-peptide upon irradiation with 365-nm light and 488- or 510-nm light was measured with Shimadzu reversed-phase (RP) HPLC system. Conditions of the RP-HPLC analysis; Column- 5C<sub>18</sub>-MS-II, 4.6×250 mm (Nacalai Tesque, Inc.); Eluent - CH<sub>3</sub>CN/H<sub>2</sub>O containing 0.1% TFA; Solvent gradient - 20 to 45% for 1 h; Flow rate – 1 ml min<sup>-1</sup> at room temperature (25 °C). Injection volume - 20 μl was used to analyze the ratio of each isomer and the isosbestic point in this eluent condition (305-nm) was used as the monitoring wavelength.

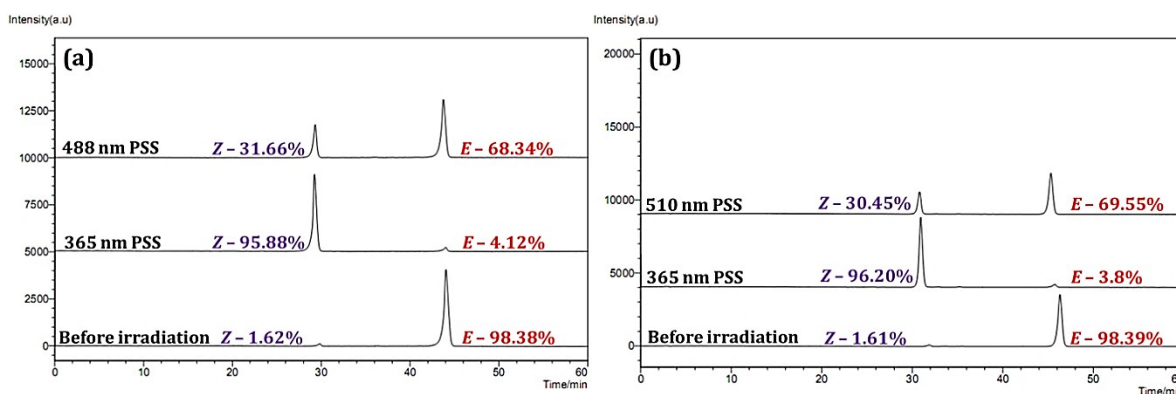

**Fig. S1** (a) and (b) HPLC chromatograms show the *Z* and *E* isomer ratio of Azo-peptide at before irradiation, after 365-nm light irradiation up to photo stationary state (PSS) and after 488- or 510-nm light irradiation up to PSS respectively.

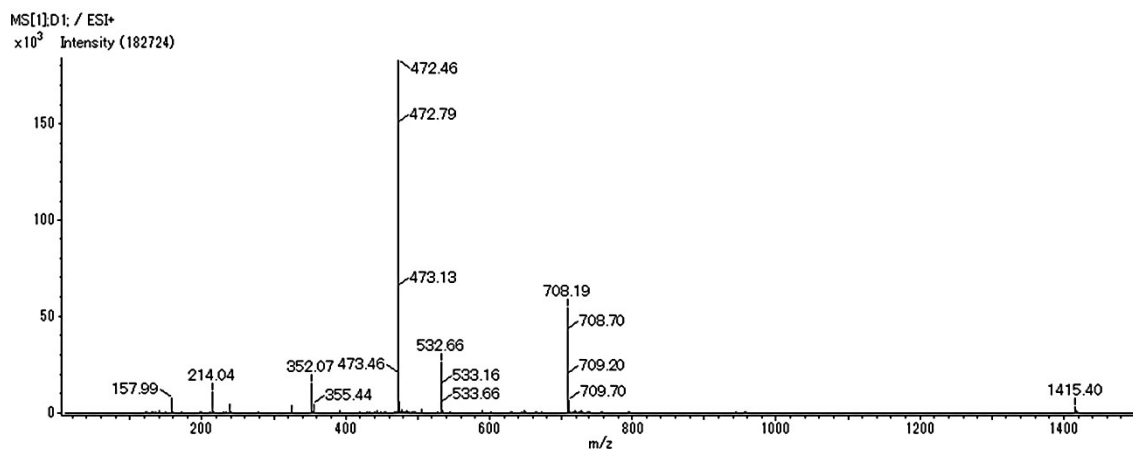

**Fig. S2** ESI mass spectrum of Azo-peptide:  $m/z = 1415.40$   $[M+H]^+$  (calcd. 1415.75)

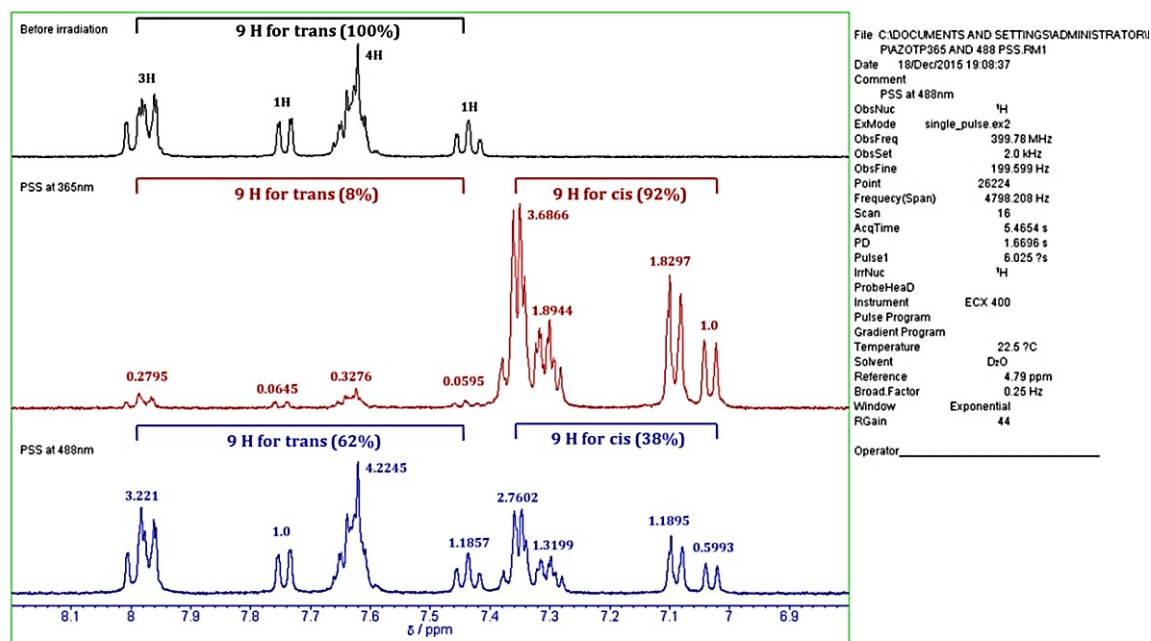

**Fig. S3** NMR spectrum shows the *Z* and *E* isomer ratio of AzoTP at before irradiation, after 365-nm light irradiation up to PSS and after 488-nm light irradiation up to PSS respectively.

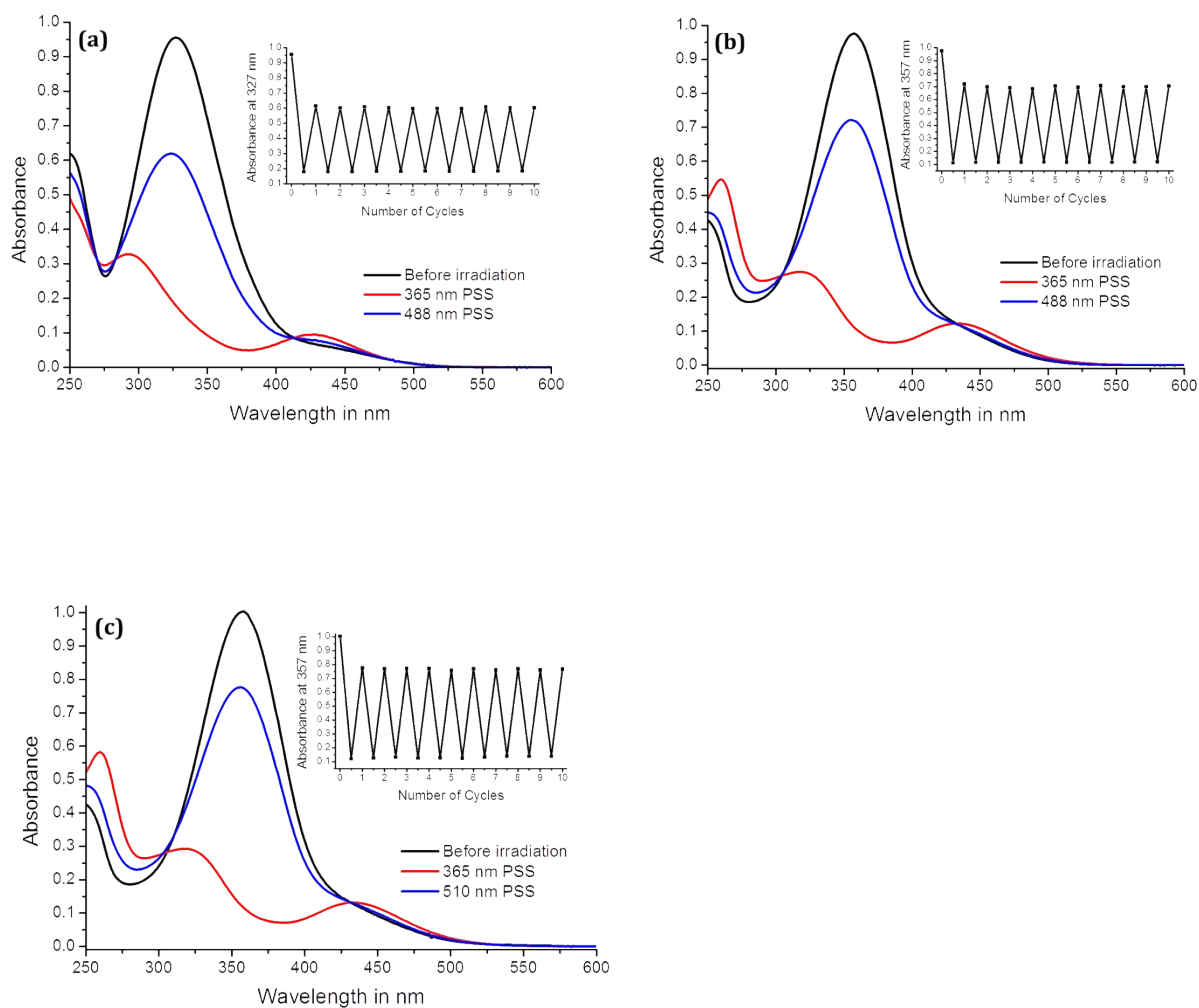

**Fig. S4** UV-visible absorption spectra of AzoTP (a) and Azo-peptide (b and c) in BRB-80 buffer solution at 25 °C; before photo-irradiation (Black line), PSS at 365-nm light irradiation (Red line), PSS at 488- or 510-nm light irradiation (Blue line). The inset shows the absorbance changes (a) at 327-nm after alternating irradiation with 365- and 488-nm light for 10 cycles, (b and c) at 357-nm after alternating irradiation with 365-nm and 488- or 510-nm light for 10 cycles.

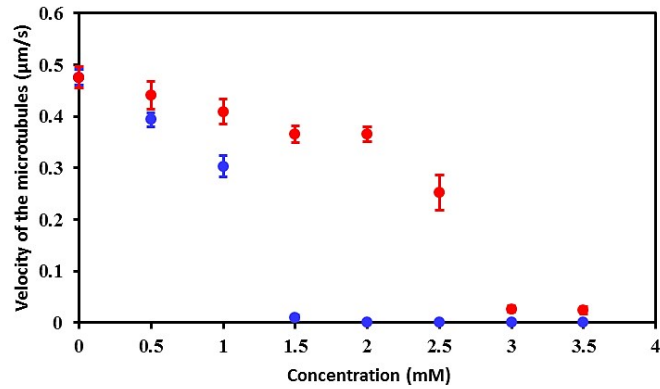

**Fig. S5** Gliding velocities of microtubules plotted with respect to the concentration of Azo-peptide at 1.0 mM ATP concentration. Blue circles: gliding velocity of microtubules in non-irradiated state; Red circles: gliding velocity after 365-nm light irradiation up to PSS; Error bars represent the standard deviation for 10 microtubules.

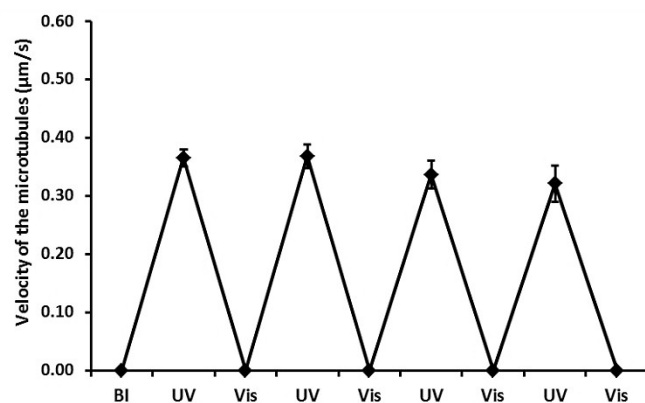

**Fig. S6** Repeatability of the photo-controllable change in the gliding velocity of microtubules in presence of Azo-peptide (2.0 mM) upon alternating irradiation with UV and visible lights (BI: Before irradiation, UV: after 365 nm light irradiation for 20 s, Vis: after 510-nm light irradiation for 40 s). Error bars represent the standard deviation for 10 microtubules.

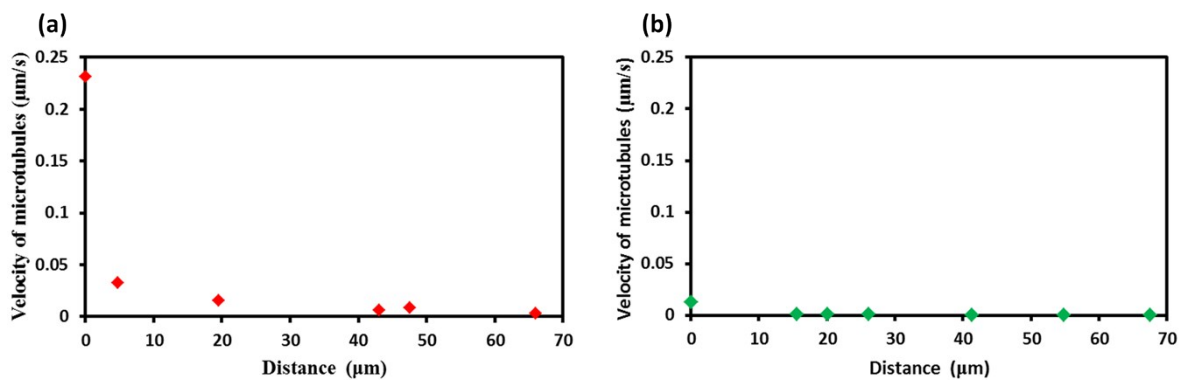

**Fig. S7** Activation profile shows the velocity of microtubules at a distance away from the local light illumination area (365 nm) while irradiating entire area with 510 nm in the presence of Azo-peptide [(a) 2.0 mM & (b) 2.5 mM] and ATP (1.0 mM).

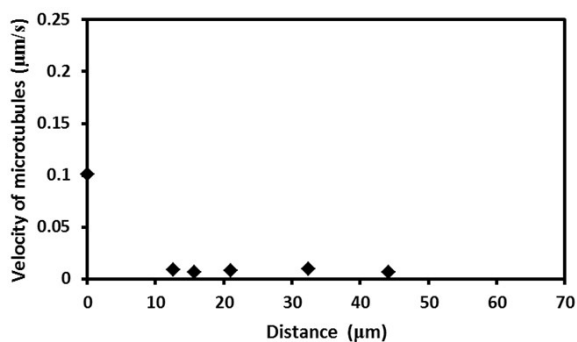

**Fig. S8** Activation profile shows the velocity of microtubules at a distance away from the local light illumination area (488 nm) while irradiating entire area with 365 nm in the presence of AzoTP (0.5 mM).

## **Fluorescence Microscopy Videos (AVI)**

### **Movie S1**

This video demonstrates the concentration and dispersion of the fluorescently labeled microtubules in the presence of Azo-peptide (2.5 mM) and ATP (1.0 mM). A local irradiation with 488-nm light covering the area of 18  $\mu\text{m}$  in diameter and keeping entire imaging area under 365-nm light concentrated the microtubules in that area. Upon removal of the 488-nm light irradiation dispersed the microtubules. This was repeated for two times at different positions. However, microtubules were slightly aggregated with each other in the inhibited state (0-30s) due to the high concentration of microtubules (1.5  $\mu\text{M}$ , MTs calculated as tubulin dimer) used. Therefore intense bright images were seen for the aggregated state of the microtubules during first 30 s and they get separated in to single microtubule filaments after 365-nm light irradiation.

### **Movie S2**

This video demonstrates the selective transportation of a single microtubule in the presence of AzoTP (0.5 mM). The selected microtubule was driven by locally irradiating it with 488-nm light covering the area of 5  $\mu\text{m}$  in diameter and keeping entire imaging area under irradiation with 365-nm. Further it was translocated by progressively changing the position of 488-nm light irradiation.

### **Movie S3**

This video demonstrates the selective transportation of a single microtubule in the presence of Azo-peptide (2.0 mM) and ATP (1.0 mM). The selected microtubule was driven by locally irradiating it with 365-nm light covering the area of 5  $\mu\text{m}$  in diameter and keeping entire imaging area under irradiation with 510-nm. Further it was translocated by progressively changing the position of 365-nm light irradiation.

#### **Movie S4**

This video demonstrates the bending and breaking of a single microtubule in the presence of Azo-peptide (2.0 mM) and ATP (1.0 mM). We first irradiated the leading end of the selected microtubule locally by 365-nm light covering the area of 5  $\mu\text{m}$  in diameter at the front while keeping entire imaging area under irradiation with 510-nm for 0-23s, which allowed it to move in the forward motion. The selected microtubule was then locally irradiated with 365-nm light covering the area of 5  $\mu\text{m}$  in diameter at the trailing end while keeping entire imaging area under irradiation with 510-nm. At that condition the microtubule started to bend, on its way of bending we changed the position of 365-nm light irradiation towards its leading end to drive forward and avoid further bending. Again, by sufficiently irradiating 365-nm light at the trailing end makes the microtubule to bend and then broken. Further, we confirmed the breaking of the microtubule by irradiating 365-nm light at the leading end which makes the microtubule to move forward and eventually broken parts get separated.
